# Supplementary material for: A biophysical study of the interactions of palladium(ii), platinum(ii) and gold(iii) complexes of aminopyridyl-2,2′-bipyridine ligands with RNAs and other nucleic acid structures
Source: Royal Society of Chemistry journal article supplement (doi:10.1039/d2dt03483b), 2022-12-09
Supplement: d2dt03483b1.pdf [file d2dt03483b1.pdf]

## SUPPORTING INFORMATION

### ***A biophysical study of the interactions of palladium(II), platinum(II) and gold(III) complexes of aminopyridyl-2,2'-bipyridine ligands with RNAs and other nucleic acid structures***

*Francesca Binacchi, Cassandra Elia, Damiano Cirri, Corjan van de Griend, Xue-Quan Zhou, Luigi Messori, Sylvestre Bonnet, Alessandro Pratesi, Tarita Biver*

#### **Table of Contents**

|                                                                                                                                 |    |
|---------------------------------------------------------------------------------------------------------------------------------|----|
| Formation of the RNA 4WJ: melting test .....                                                                                    | 2  |
| Spectrophotometric characterisation of the metal complexes .....                                                                | 3  |
| Poly(rA) <sub>2</sub> poly(rU) absorbance titrations.....                                                                       | 8  |
| Melting Tests.....                                                                                                              | 9  |
| Poly(rA)poly(rU) Ethidium displacement .....                                                                                    | 10 |
| DNA Absorbance titrations.....                                                                                                  | 11 |
| DNA Ethidium displacement and viscometric tests.....                                                                            | 12 |
| Circular Dichroism spectra of [Pd(H <sub>2</sub> L1)]Cl <sub>2</sub> /DNA and [Pt(H <sub>2</sub> L1)]Cl <sub>2</sub> /DNA ..... | 13 |
| G-quadruplex absorbance titrations .....                                                                                        | 14 |
| G-quadruplex ESI mass spectra .....                                                                                             | 15 |
| RNA-4WJ absorbance titrations .....                                                                                             | 17 |
| RNA-4WJ melting tests .....                                                                                                     | 18 |

## Formation of the RNA 4WJ: melting test

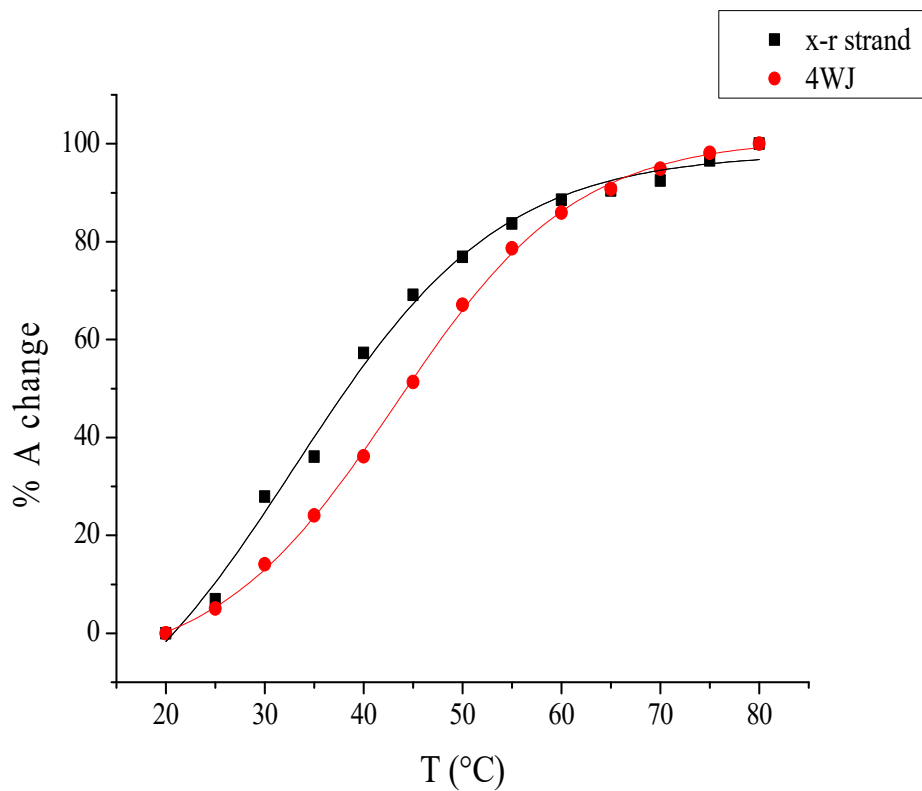

**Figure S1.** UV-melting tests of the coupled x-r strands and of the RNA 4WJ;  $C_{\text{x-r strand}} = C_{\text{4WJ}} = 1.03 \times 10^{-5}$  M;  $C_{\text{CaCl}_2} = 182 \mu\text{M}$ . % A change =  $100 \cdot (A - A^\circ) / (A^\infty - A^\circ)$  where  $A^\circ$  and  $A^\infty$  are the two absorbance values limiting the fitting sigmoid.

## Spectrophotometric characterisation of the metal complexes

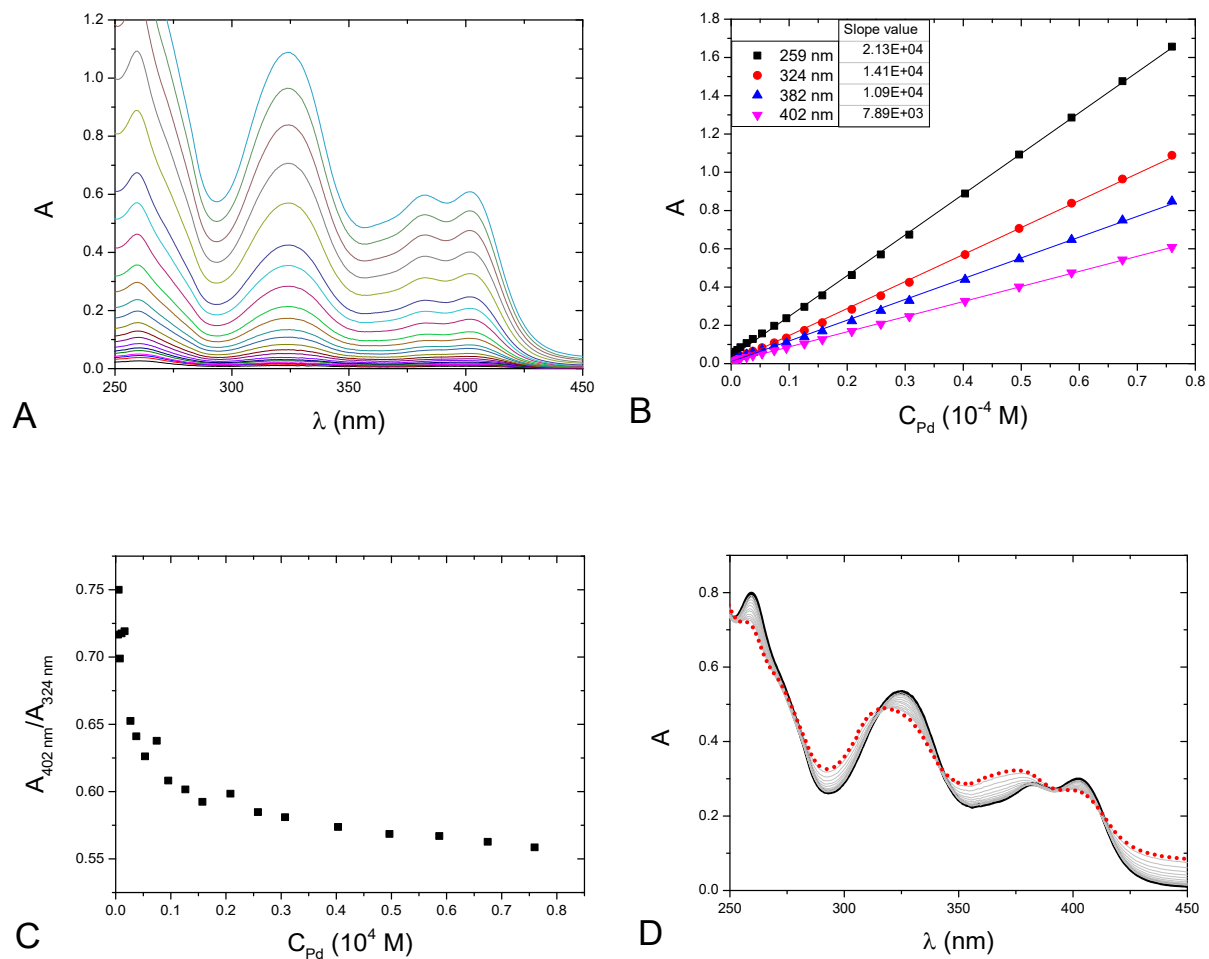

**Figure S2.**  $[Pd(H_2L1)]Cl_2$ : absorbance spectra at different concentrations (A)  $C_{Pd}$  from 0 M to  $7.60 \times 10^{-5}$  M with relevant absorbance versus concentration plot (B) and absorbance ratio plot (C), 25.0 °C; (D) absorbance spectra in the 25 °C (—) – 90 °C (.....) temperature range,  $C_{Pd} = 2.08 \times 10^{-5}$  M, NaCl 0.1 M, NaCac 2.5 mM, pH = 7.0.

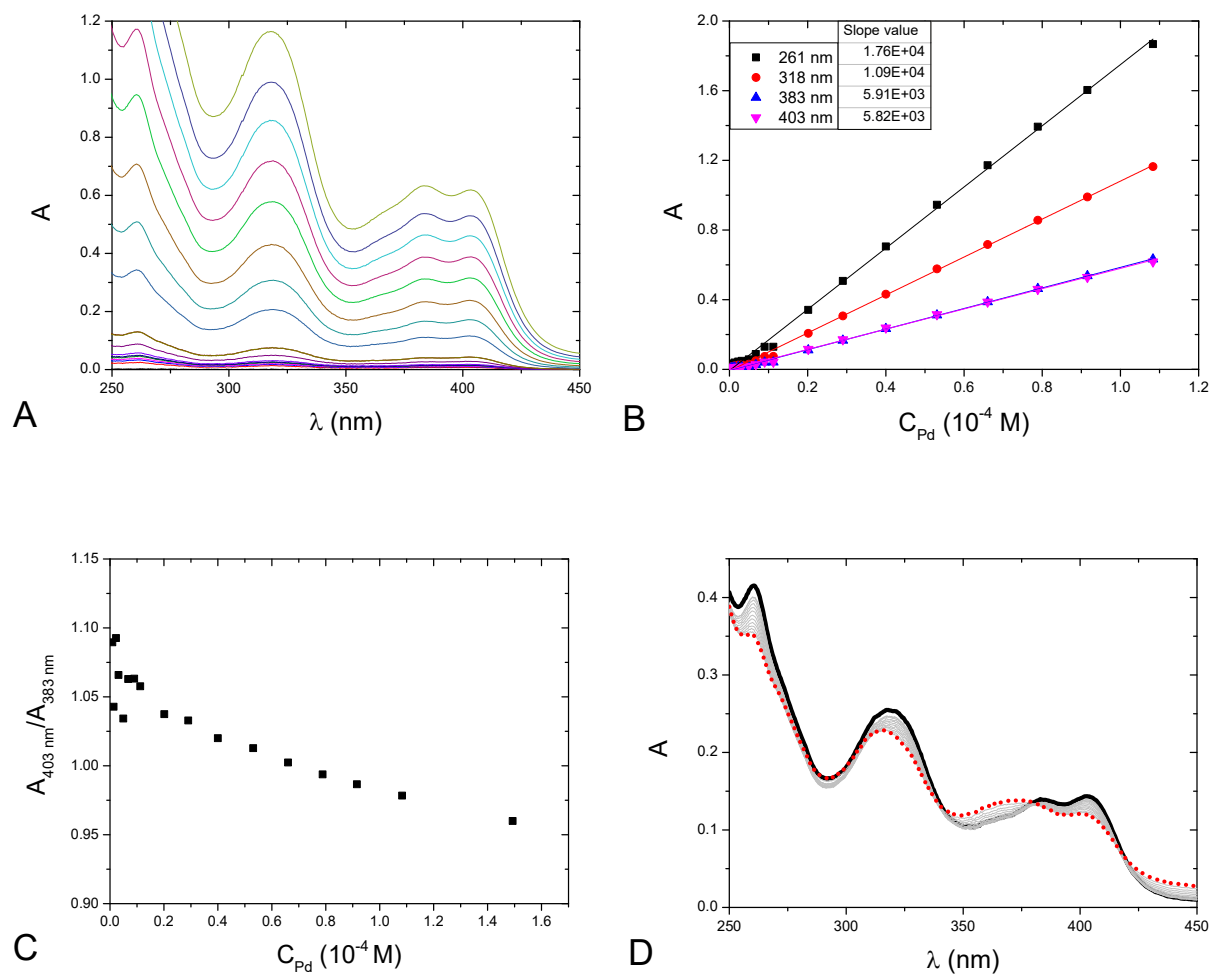

**Figure S3.**  $[\text{Pd}(\text{H}_2\text{L}_2)]\text{Cl}_2$ : absorbance spectra at different concentrations (A)  $C_{\text{Pd}}$  from 0 M to  $1.08 \times 10^{-4}$  M with relevant absorbance versus concentration plot (B) and absorbance ratio plot (C), 25.0 C; (D) absorbance spectra in the 25 °C (—) – 90 °C (.....) temperature range,  $C_{\text{Pd}} = 2.01 \times 10^{-5}$  M, NaCl 0.1 M, NaCac 2.5 mM, pH = 7.0.

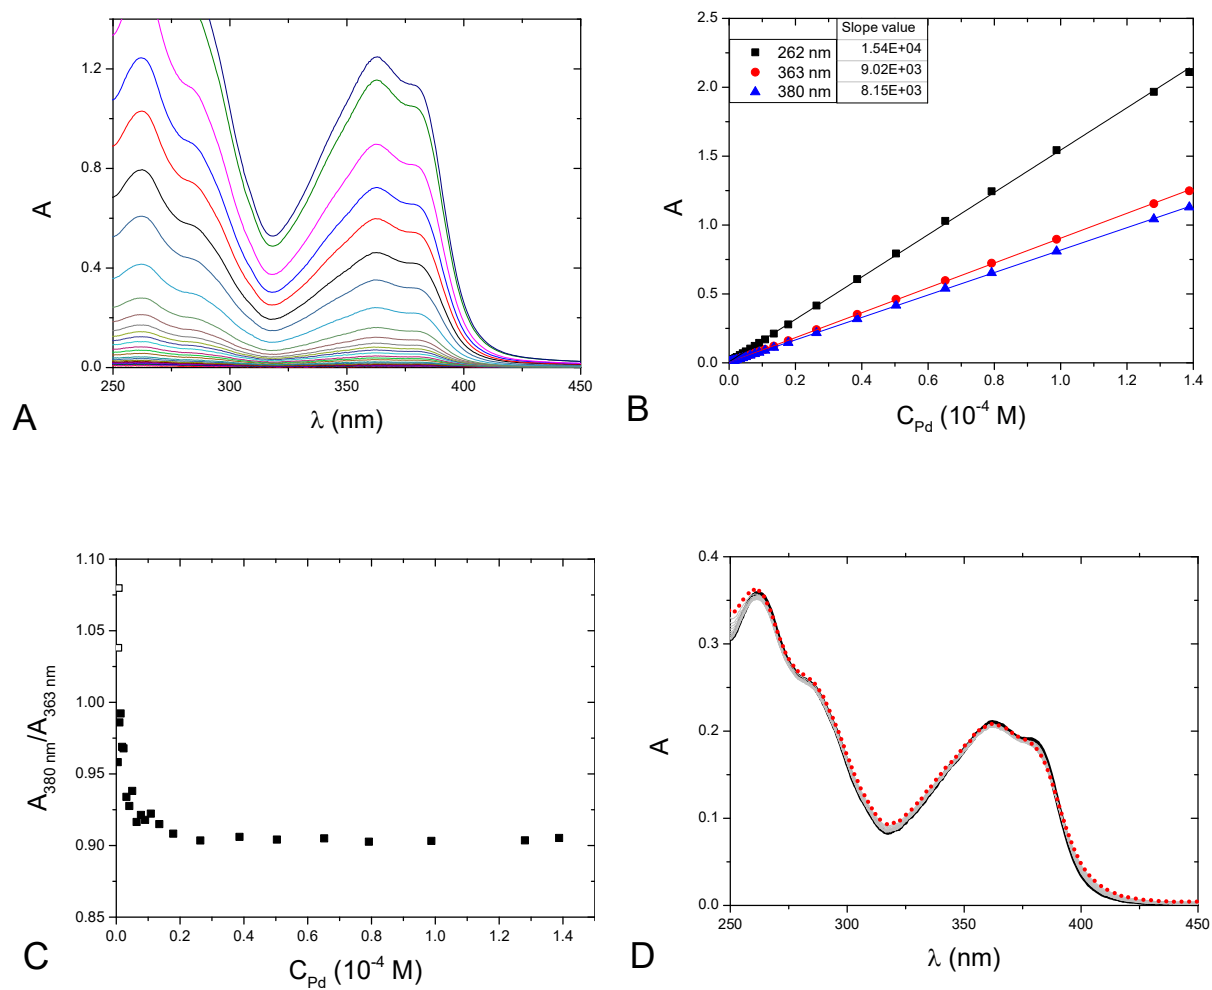

**Figure S4.**  $[\text{Pd}(\text{L3})](\text{OAc})_2$ : absorbance spectra at different concentrations (A)  $C_{\text{Pd}}$  from 0 M to  $1.39 \times 10^{-4}$  M with relevant absorbance versus concentration plot (B) and absorbance ratio plot (C), 25.0 °C; (D) absorbance spectra in the 25 °C (—) – 90 °C (.....) temperature range,  $C_{\text{Pd}} = 2.64 \times 10^{-5}$  M. NaCl 0.1 M, NaCac 2.5 mM, pH = 7.0.

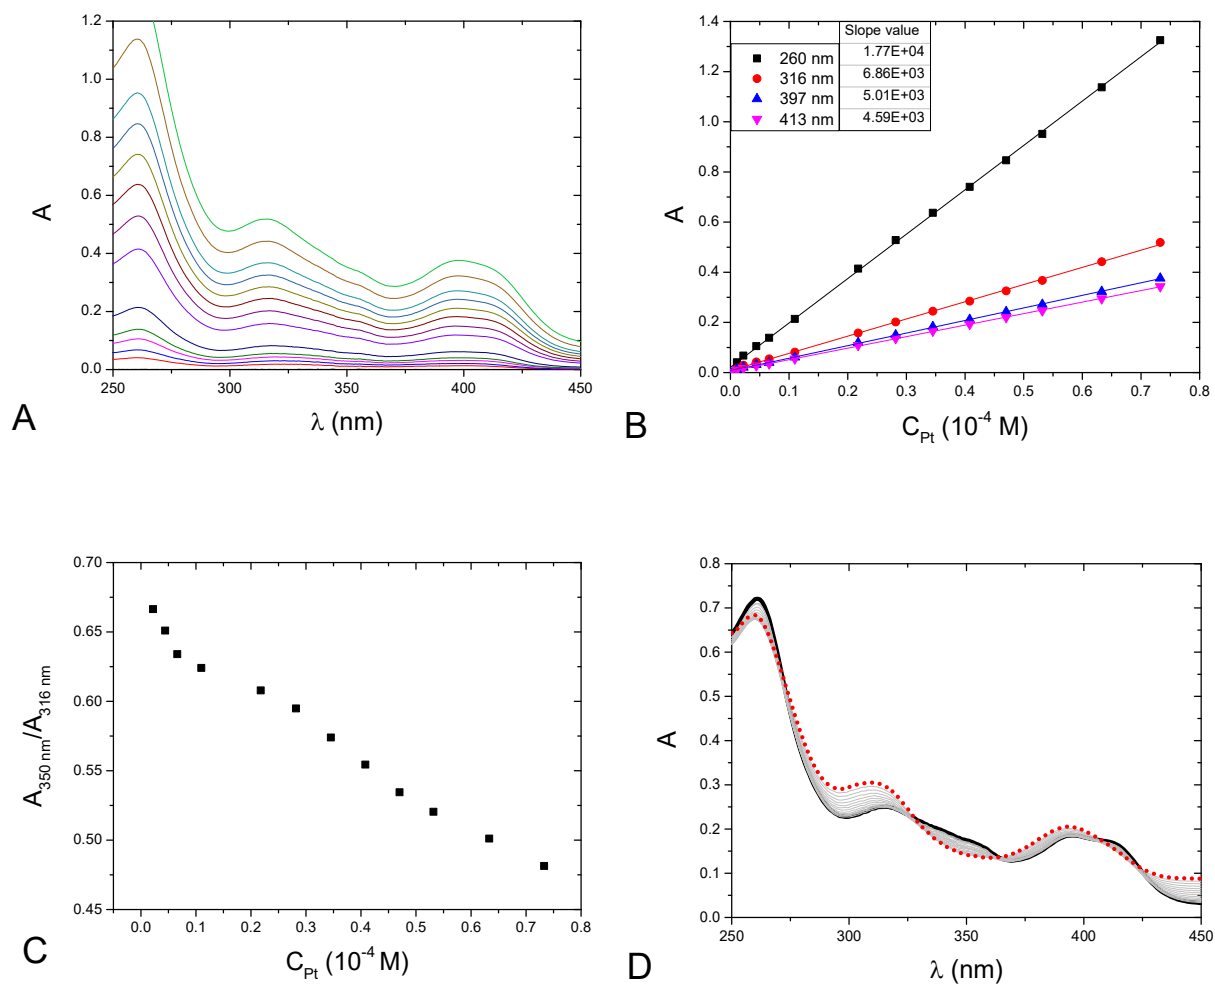

**Figure S5.** Complex  $[\text{Pt}(\text{H}_2\text{L1})]\text{Cl}_2$ : absorbance spectra at different concentrations (A)  $C_{\text{Pt}}$  from 0 M to  $7.33 \times 10^{-5}$  M with relevant absorbance versus concentration plot (B) and absorbance ratio plot (C), 25.0 °C; (D) absorbance spectra in the 25 °C (—) – 90 °C (.....) temperature range,  $C_{\text{Pt}} = 3.10 \times 10^{-5}$  M. NaCl 0.1 M, NaCac 2.5 mM, pH = 7.0.

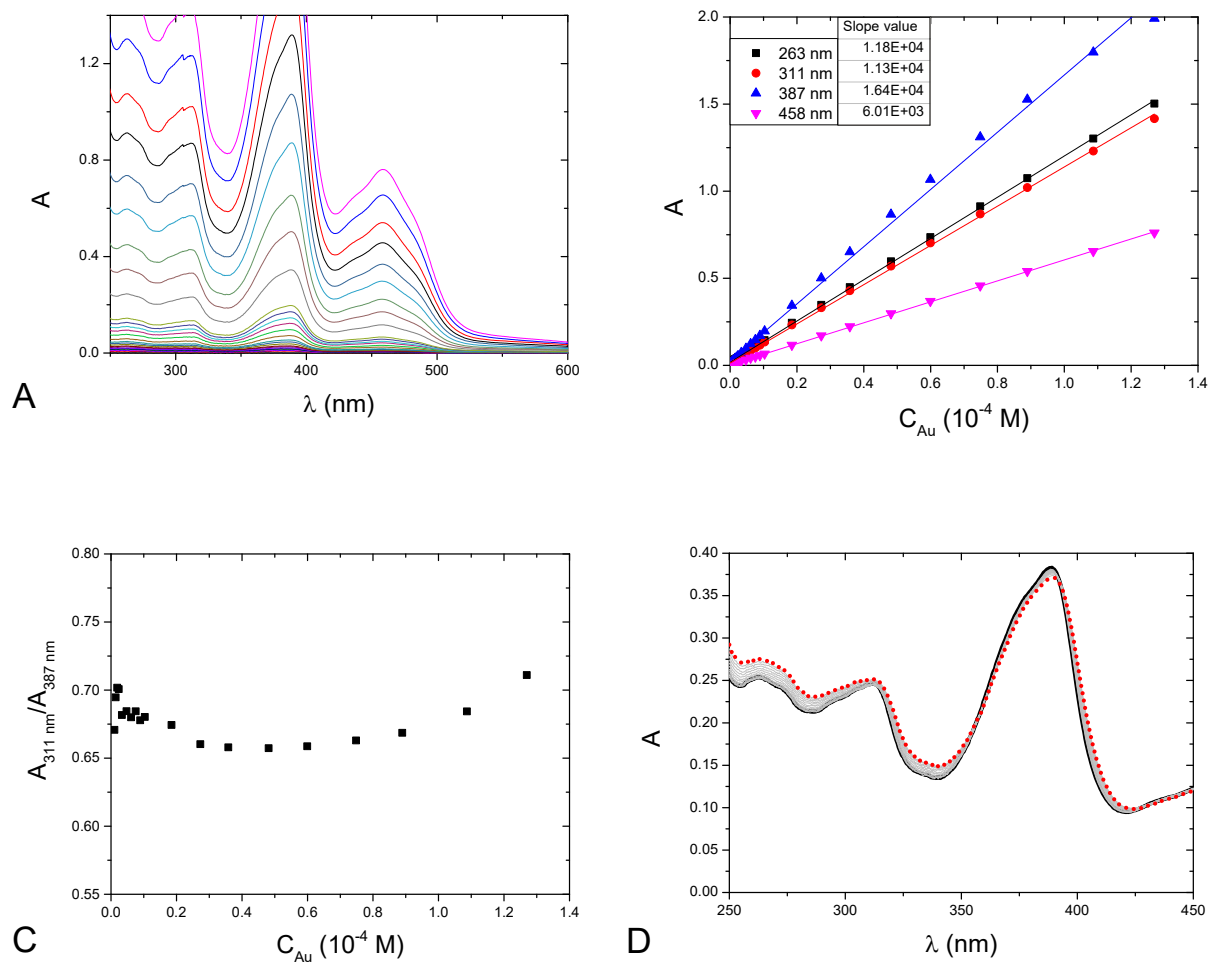

**Figure S6.** Complex [Au(L1)]Cl: A) Absorbance spectrum  $C_{Au} = 2.73 \times 10^{-5}$  M,  $T = 25$  °C; B) Absorbance versus temperature plot at different wavelengths,  $C_{Au} = 2.73 \times 10^{-5}$  M; C) Absorbance versus concentration plot,  $T = 25$  °C; (D) Absorbance ratio plot,  $T = 25$  °C. Buffer: NaCl 0.1 M, NaCac 2.5 mM, pH = 7.0.

## Poly(rA)2poly(rU) absorbance titrations

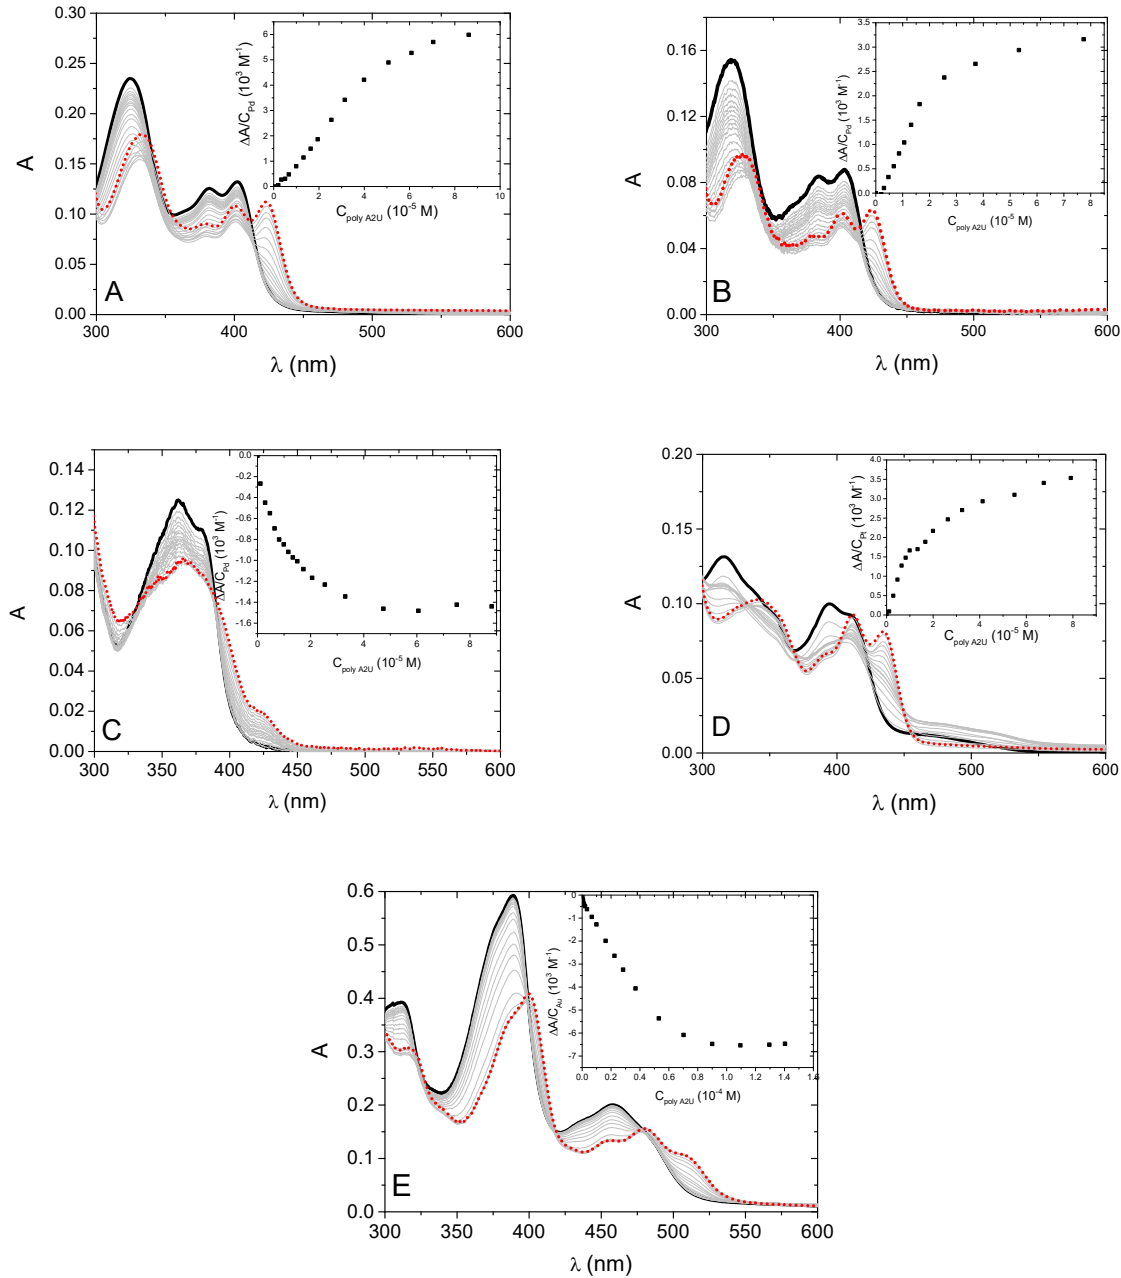

**Figure S7.** UV-vis titrations with poly(rA)·2poly(rU), NaCl 0.1 M, NaCac 2.5 mM, pH 7.0, 25.0 °C. (A) [Pd(H<sub>2</sub>L1)]Cl<sub>2</sub>/polyA<sub>2</sub>U system,  $C_{\text{Pd}} = 1.44 \times 10^{-5} \text{ M}$ ,  $C_{\text{polyA2U}}$  from 0 M (—) to  $8.61 \times 10^{-5} \text{ M}$  (.....), the inset is the binding isotherm at  $\lambda = 425 \text{ nm}$ ; (B) [Pd(H<sub>2</sub>L2)]Cl<sub>2</sub>/polyA<sub>2</sub>U system,  $C_{\text{Pd}} = 1.37 \times 10^{-5} \text{ M}$ ,  $C_{\text{polyA2U}}$  from 0 M (—) to  $7.74 \times 10^{-5} \text{ M}$  (.....), the inset is the binding isotherm at  $\lambda = 425 \text{ nm}$ ; (C) [Pd(L3)](OAc)<sub>2</sub>/polyA<sub>2</sub>U system,  $C_{\text{Pd}} = 1.68 \times 10^{-5} \text{ M}$ ,  $C_{\text{polyA2U}}$  from 0 M (—) to  $8.81 \times 10^{-5} \text{ M}$  (.....), the inset is the binding isotherm at  $\lambda = 369 \text{ nm}$ ; (D) [Pt(H<sub>2</sub>L1)]Cl<sub>2</sub>/polyA<sub>2</sub>U system,  $C_{\text{Pt}} = 1.56 \times 10^{-5} \text{ M}$ ,  $C_{\text{polyA2U}}$  from 0 M (—) to  $7.91 \times 10^{-5} \text{ M}$  (.....), the inset is the binding isotherm at  $\lambda = 434 \text{ nm}$ ; (E) [Au(L1)]Cl/polyA<sub>2</sub>U system,  $C_{\text{Au}} = 3.46 \times 10^{-5} \text{ M}$ ,  $C_{\text{polyA2U}}$  from 0 M (—) to  $1.4 \times 10^{-4} \text{ M}$  (.....), the inset is the binding isotherm at  $\lambda = 389 \text{ nm}$ .



## Melting Tests

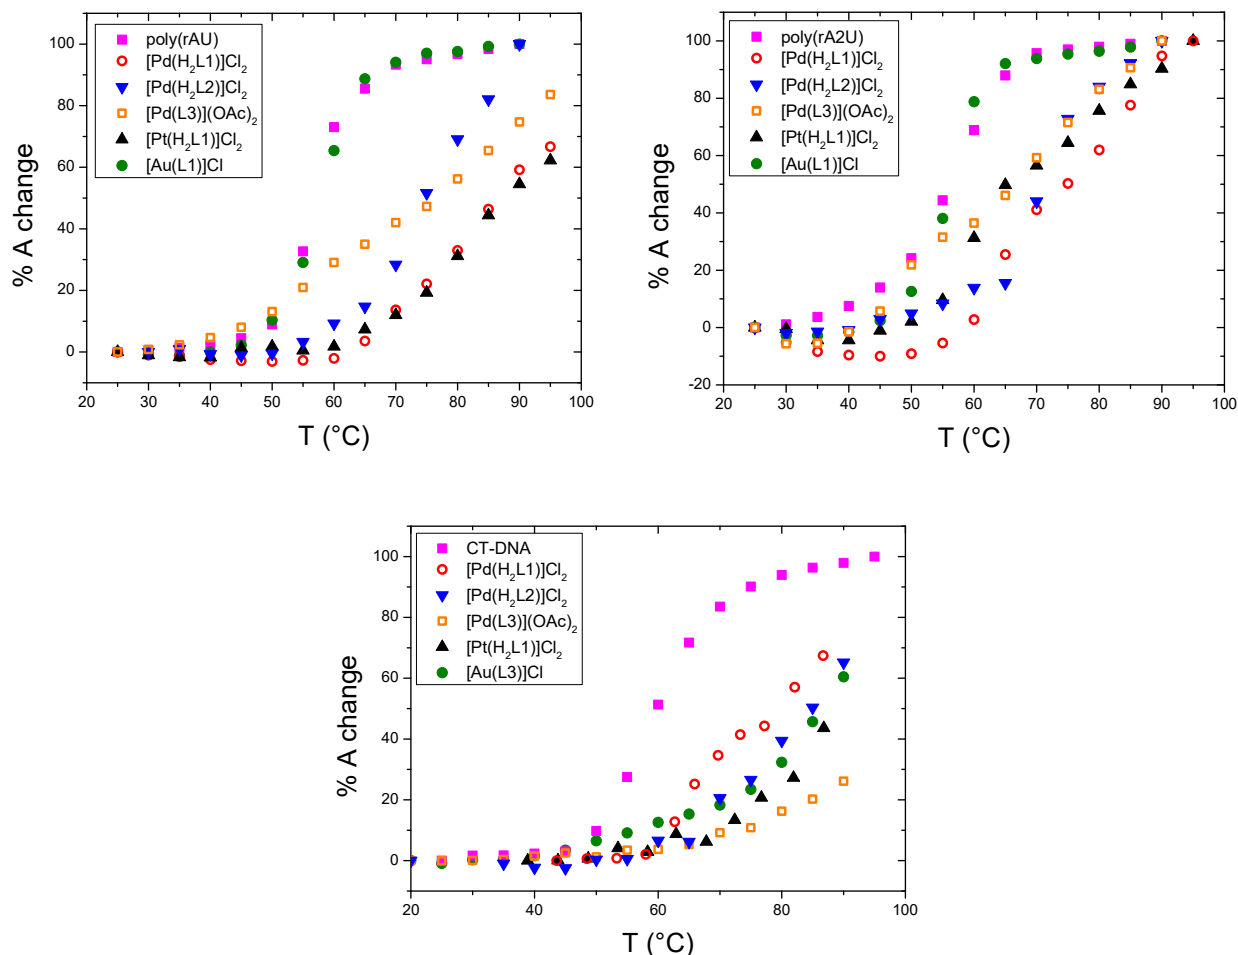

**Figure S8.** Melting tests for the poly(rA)poly(rU), poly(rA)2poly(rU) or CT-DNA polynucleotide alone (full squares) and for its mixtures with [Pd(H<sub>2</sub>L1)]<sup>2+</sup> (open circles), [Pd(H<sub>2</sub>L2)]<sup>2+</sup> (down triangles), [Pd(L3)]<sup>2+</sup> (open squares), [Pt(H<sub>2</sub>L1)]<sup>2+</sup> (up triangles), [Au(L1)]<sup>+</sup> (full circles);  $C_{\text{polyrAU}} = C_P$  (in base pairs) =  $2.45 \times 10^{-5}$  M,  $C_{\text{polyrA2U}} = C_P$  (in base triplets) =  $1.92 \times 10^{-5}$  M,  $C_{\text{DNA}} = C_P$  (in base pairs) =  $2.45 \times 10^{-5}$  M,  $r_b = \text{complex/DNA} = C_D/C_P = 1.0$ , buffer for RNAs NaCl 0.1 M, NaCac 2.5 mM, pH 7.0,  $\lambda = 260$  nm, for CT-DNA NaCac 2.5 mM, pH 7.0,  $\lambda = 260$  nm; % A change =  $100 \cdot (A - A^\circ) / (A^\infty - A^\circ)$  where  $A^\infty$  and  $A^\circ$  are the two absorbance values limiting the fitting sigmoid.

**Table S1.** Melting temperature of the polynucleotide alone (Ref) and for its mixtures with  $[\text{Pd}(\text{H}_2\text{L1})]^{2+}$ ,  $[\text{Pd}(\text{H}_2\text{L2})]^{2+}$ ,  $[\text{Pd}(\text{L3})]^{2+}$ ,  $[\text{Pt}(\text{H}_2\text{L1})]^{2+}$ ,  $[\text{Au}(\text{L1})]^+$ . Buffer for RNAs NaCl 0.1 M, NaCac 2.5 mM, pH 7.0, for CT-DNA NaCac 2.5 mM, pH 7.0, for G-quad KCl 0.1M, LiCac 2.5 mM, pH 7.0.

|                                               | poly(rAU)      | poly(rA2U)     | CT-DNA         | G4             |
|-----------------------------------------------|----------------|----------------|----------------|----------------|
| Ref                                           | $57.0 \pm 0.3$ | $56.0 \pm 0.3$ | $59.8 \pm 0.3$ | $62.6 \pm 0.2$ |
| $[\text{Pd}(\text{H}_2\text{L1})]\text{Cl}_2$ | > 90           | $74 \pm 2$     | > 90           | $68.7 \pm 0.5$ |
| $[\text{Pd}(\text{H}_2\text{L2})]\text{Cl}_2$ | $76.7 \pm 0.9$ | $71.3 \pm 0.7$ | $82 \pm 3$     | $65.1 \pm 0.2$ |
| $[\text{Pd}(\text{L3})](\text{OAc})_2$        | $83 \pm 6$     | $67 \pm 3$     | > 90           | $67.9 \pm 0.2$ |
| $[\text{Pt}(\text{H}_2\text{L1})]\text{Cl}_2$ | > 90           | $67 \pm 1$     | > 90           | $65.0 \pm 0.4$ |
| $[\text{Au}(\text{L1})]\text{Cl}$             | $57.7 \pm 0.2$ | $55.9 \pm 0.2$ | > 90           | $64.8 \pm 0.3$ |

## Poly(rA)poly(rU) Ethidium displacement

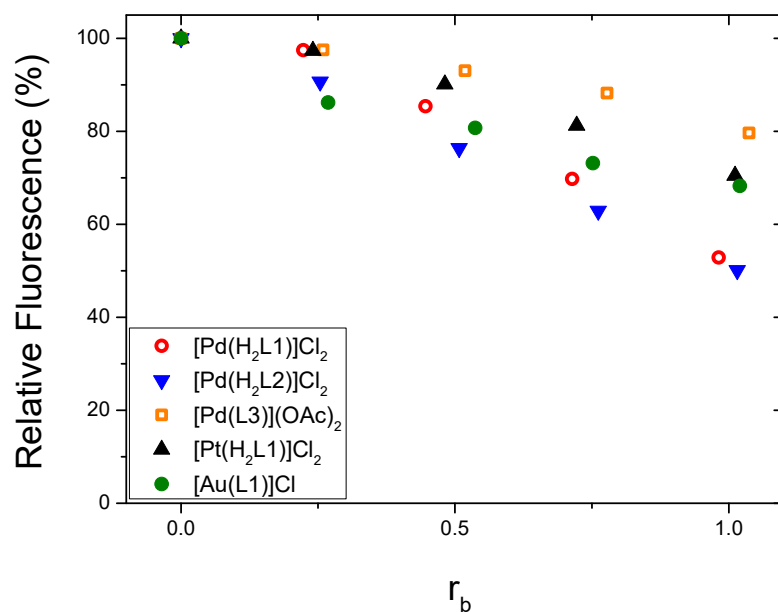

**Figure S9.** Ethidium bromide (EtBr) exchange tests where the metal complexes are added to EtBr-saturated poly(rA)poly(rU) where the latter adduct is strongly fluorescent only as the EtBr probe is intercalated between polynucleotide base pairs;  $C_{\text{polyAU}} = 1.25 \times 10^{-4}$  M,  $C_{\text{EtBr}} = 5.84 \times 10^{-5}$  M,  $r_b = \text{complex}/\text{DNA} = C_D/C_{\text{polyAU}}$ , relative fluorescence =  $100 * F/F^\circ$  where  $F^\circ$  is the fluorescence of the system at  $r_b = 0$ ,  $\lambda_{\text{ex}} = 520$  nm,  $\lambda_{\text{em}} = 595$  nm.

## DNA Absorbance titrations

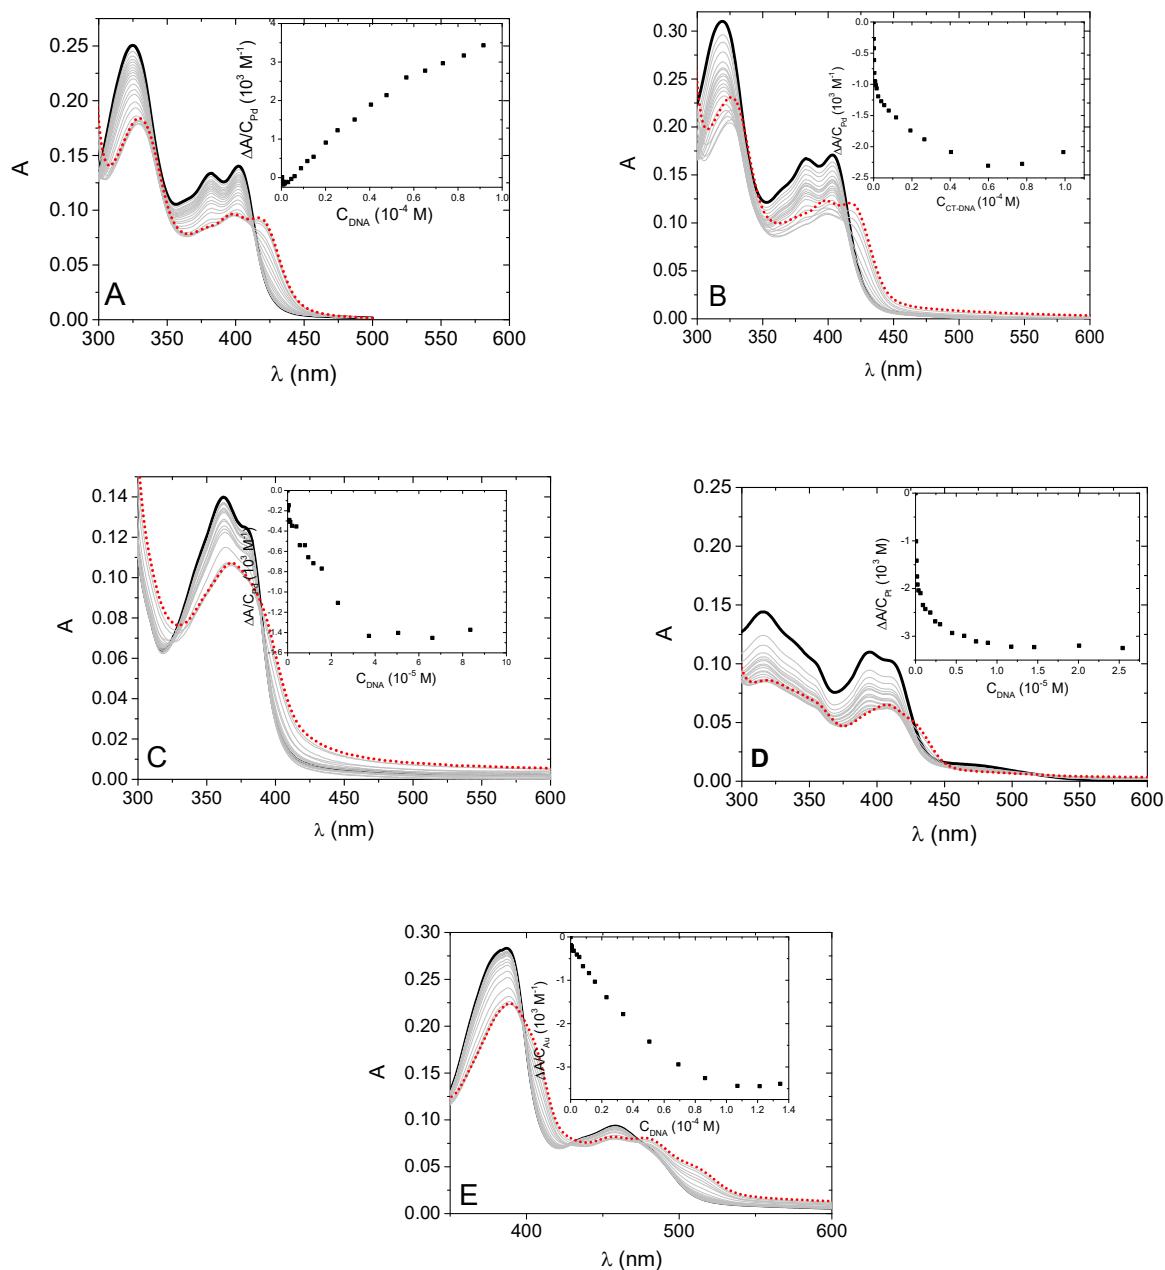

**Figure S10.** UV-vis titrations where increasing amounts of DNA are added to the complexes (NaCl 0.1 M, NaCac 2.5 mM, pH 7.0, 25.0 °C); (A) [Pd(H<sub>2</sub>L1)]Cl<sub>2</sub>/DNA system,  $C_{Pd} = 1.44 \times 10^{-5}$  M,  $C_{DNA}$  from 0 M (—) to  $9.15 \times 10^{-5}$  M (.....), the inset is the binding isotherm at  $\lambda = 418$  nm; (B) [Pd(H<sub>2</sub>L2)]Cl<sub>2</sub>/DNA system,  $C_{Pd} = 2.72 \times 10^{-5}$  M,  $C_{DNA}$  from 0 M (—) to  $1.23 \times 10^{-4}$  M (.....), the inset is the binding isotherm at  $\lambda = 418$  nm; (C) [Pd(L3)](OAc)<sub>2</sub>/DNA system,  $C_{Pd} = 1.68 \times 10^{-5}$  M,  $C_{DNA}$  from 0 M (—) to  $8.35 \times 10^{-5}$  M (.....), the inset is the binding isotherm at  $\lambda = 418$  nm; (D) [Pt(H<sub>2</sub>L1)]Cl<sub>2</sub>/DNA system,  $C_{Pt} = 1.87 \times 10^{-5}$  M,  $C_{DNA}$  from 0 M (—) to  $2.54 \times 10^{-5}$  M (.....), the inset is the binding isotherm at  $\lambda = 396$  nm. (E) [Au(L1)]Cl/DNA system,  $C_{Au} = 1.74 \times 10^{-5}$  M,  $C_{DNA}$  from 0 M (—) to  $1.35 \times 10^{-4}$  M (.....), the inset is the binding isotherm at  $\lambda = 388$  nm.

## DNA Ethidium displacement and viscometric tests

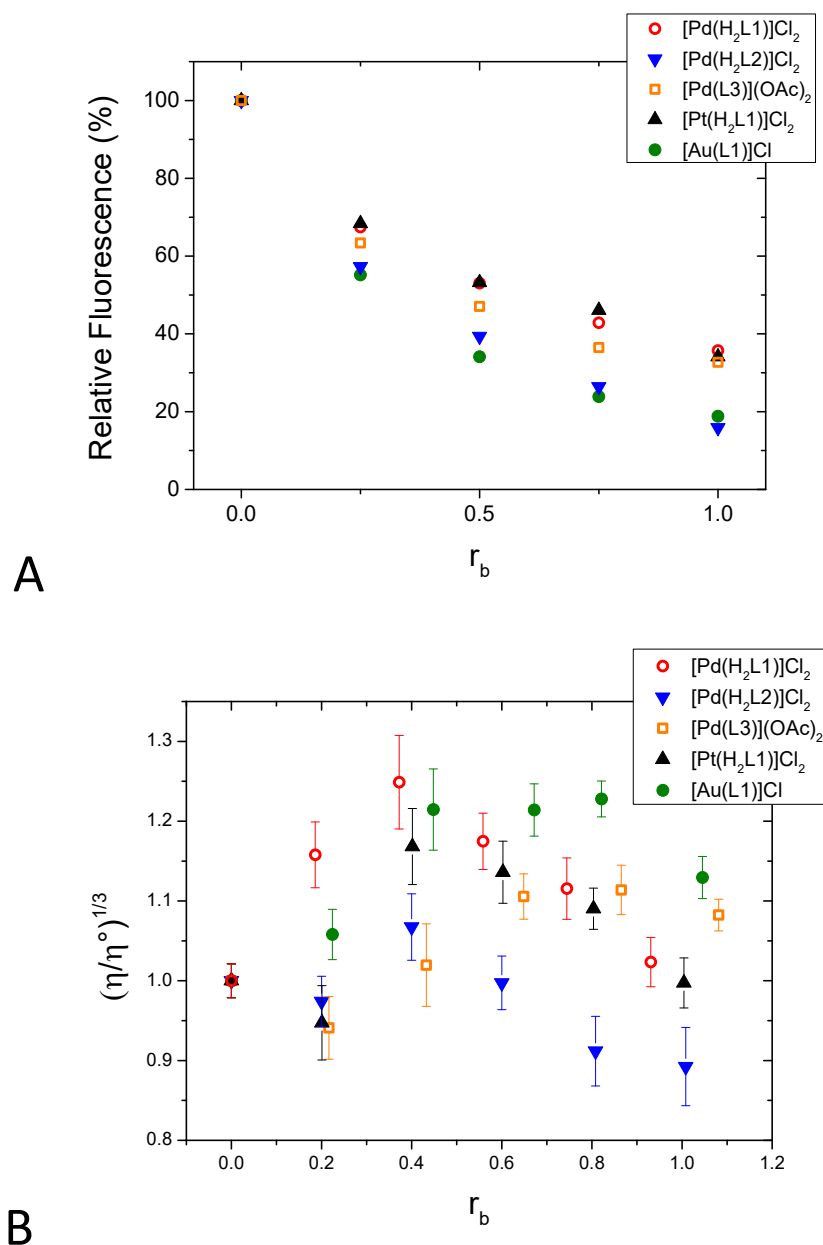

**Figure S11.** (A) Ethidium bromide (EtBr) exchange tests where the metal complexes are added to EtBr-saturated DNA where the latter adduct is strongly fluorescent only as the EtBr probe is intercalated between polynucleotide base pairs;  $C_{\text{DNA}} = 1.49 \times 10^{-4}$  M,  $C_{\text{EtBr}} = 6.11 \times 10^{-5}$  M,  $r_b = \text{complex/DNA} = C_D/C_{\text{DNA}}$ , relative fluorescence =  $100 \cdot F/F^\circ$  where  $F^\circ$  is the fluorescence of the system at  $r_b = 0$ ,  $\lambda_{\text{ex}} = 520$  nm,  $\lambda_{\text{em}} = 595$  nm. (B) Viscosity of DNA with increasing amount of metal complexes;  $C_{\text{DNA}} = 1.2 \times 10^{-4}$  M,  $r_b = \text{complex/DNA}$ ,  $(\eta/\eta^\circ)^{1/3} = (t_{\text{complex}} - t_{\text{DNA}})/(t_{\text{DNA}} - t_{\text{solvent}})$ . For both panels NaCl 0.1 M, NaCac 2.5 mM, 25.0°C, pH 7.0.

## Circular Dichroism spectra of [Pd(H<sub>2</sub>L1)]Cl<sub>2</sub>/DNA and [Pt(H<sub>2</sub>L1)]Cl<sub>2</sub>/DNA

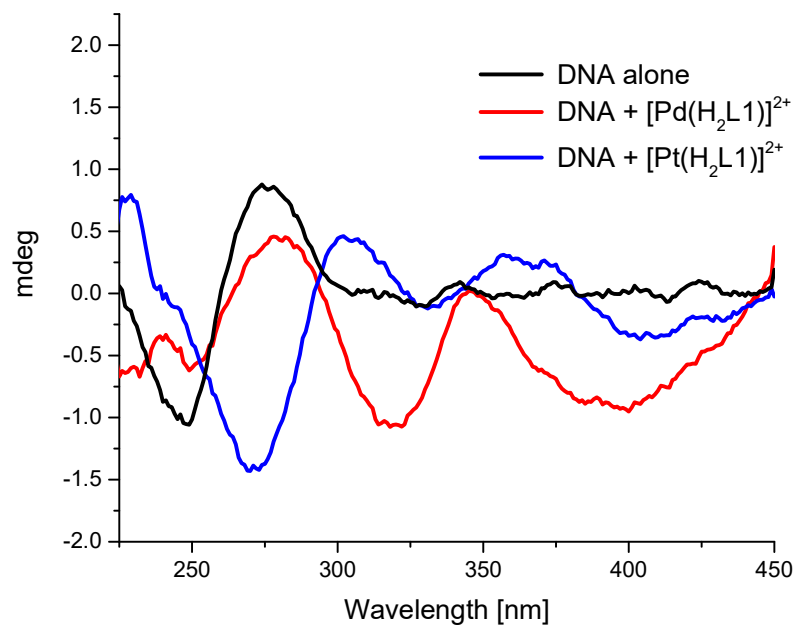

**Figure S12.** Circular dichroism spectra of DNA alone and in mixture with wither [Pd(H<sub>2</sub>L1)]<sup>2+</sup> or [Pt(H<sub>2</sub>L1)]<sup>2+</sup> metal complexes.  $C_{\text{DNA}} = 1.0 \times 10^{-5}$  M;  $C_{\text{Pd}} = C_{\text{Pt}} = 2.2 \times 10^{-5}$  M; NaCl 0.1 M, NaCac 2.5 mM, T = 25.0 °C, pH 7.0.

## G-quadruplex absorbance titrations

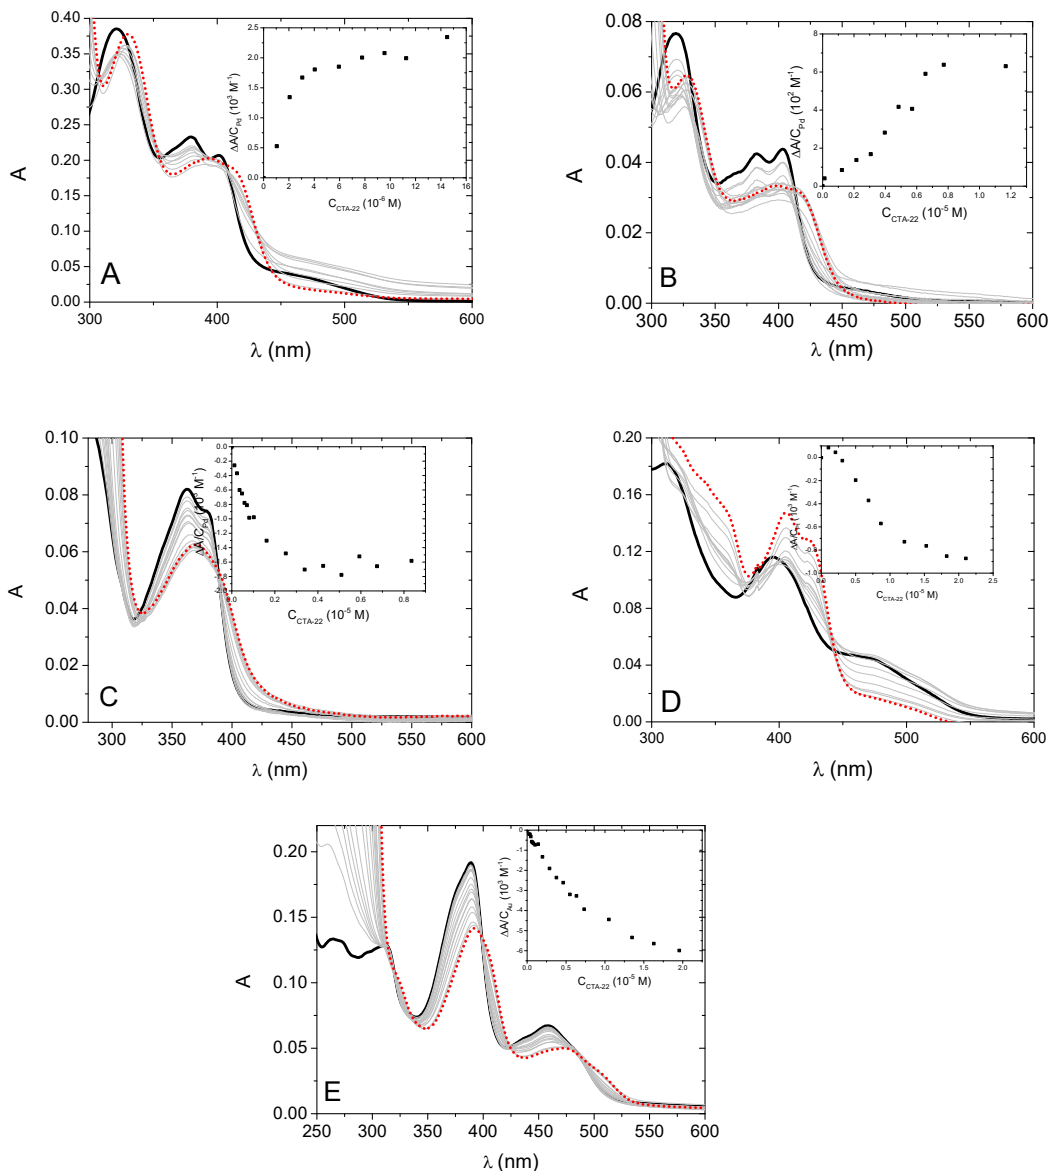

**Figure S13.** UV-vis titrations with G-quadruplex (CTA-22), KCl 0.1 M, LiCac 2.5 mM, pH 7.0, T = 25.0 °C. (A) [Pd(H<sub>2</sub>L1)]Cl<sub>2</sub>/CTA-22 system, C<sub>Pd</sub> = 2.87×10<sup>-5</sup> M, C<sub>CTA-22</sub> from 0 M (—) to 1.45×10<sup>-5</sup> M (.....), the inset is the binding isotherm at λ = 425 nm; (B) [Pd(H<sub>2</sub>L2)]Cl<sub>2</sub>/polyA2U system, C<sub>Pd</sub> = 9.08×10<sup>-6</sup> M, C<sub>CTA-22</sub> from 0 M (—) to 1.17×10<sup>-5</sup> M (.....), the inset is the binding isotherm at λ = 422 nm; (C) [Pd(L3)](OAc)<sub>2</sub>/polyA2U system, C<sub>Pd</sub> = 9.53×10<sup>-6</sup> M, C<sub>CTA-22</sub> from 0 M (—) to 8.35×10<sup>-6</sup> M (.....), the inset is the binding isotherm at λ = 369 nm; (D) [Pt(H<sub>2</sub>L1)]Cl<sub>2</sub>/polyA2U system, C<sub>Pt</sub> = 3.10×10<sup>-5</sup> M, C<sub>CTA-22</sub> from 0 M (—) to 2.10×10<sup>-5</sup> M (.....), the inset is the binding isotherm at λ = 434 nm; (E) [Au(L1)]Cl/polyA2U system, C<sub>Au</sub> = 8.68×10<sup>-6</sup>, CTA22 from 0 M (—) to 1.96×10<sup>-5</sup> M (...), the inset is the binding isotherm at λ = 389 nm.

## G-quadruplex ESI mass spectra

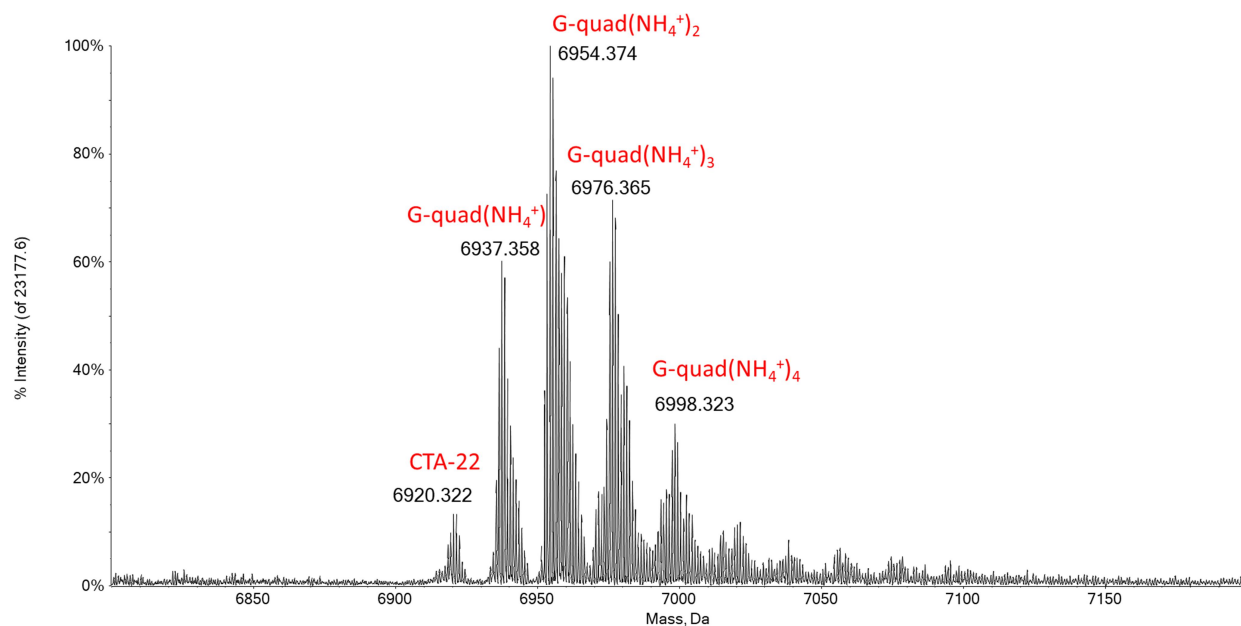

**Figure S14.** Deconvoluted ESI mass spectra of  $10^{-6}$  M CTA-22 annealed in 100 mM ammonium acetate solution (pH 7.0) and recorded in the presence of 60% EtOH.

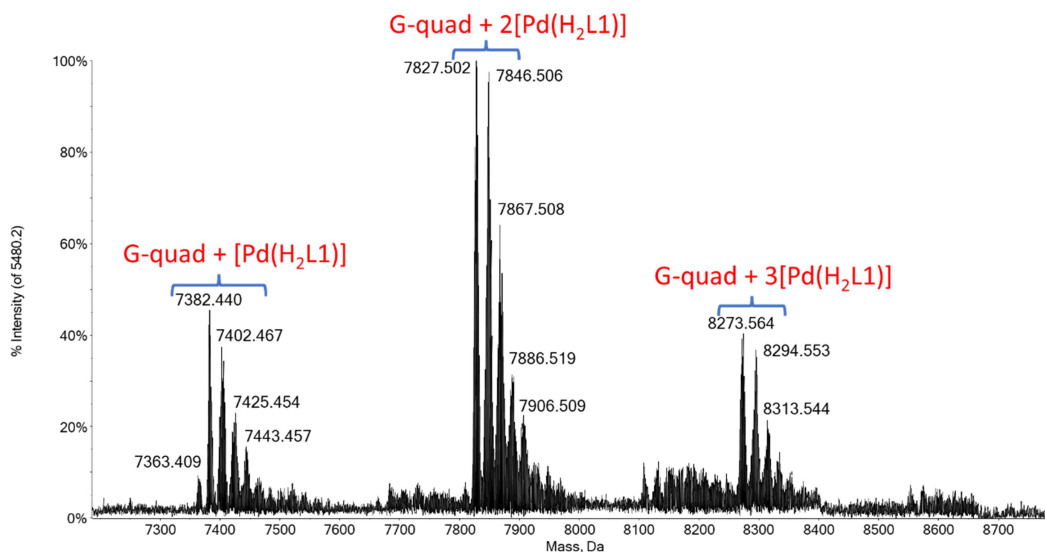

**Figure S15.** Deconvoluted ESI mass spectrum of  $10^{-6}$  M G-quadruplex incubated for 24 h with [Pd(H<sub>2</sub>L1)]Cl<sub>2</sub> in 100 mM ammonium acetate solution (pH 7.0) and in the presence of 60% EtOH. 3:1 metal complex/G-quad molar ratio.

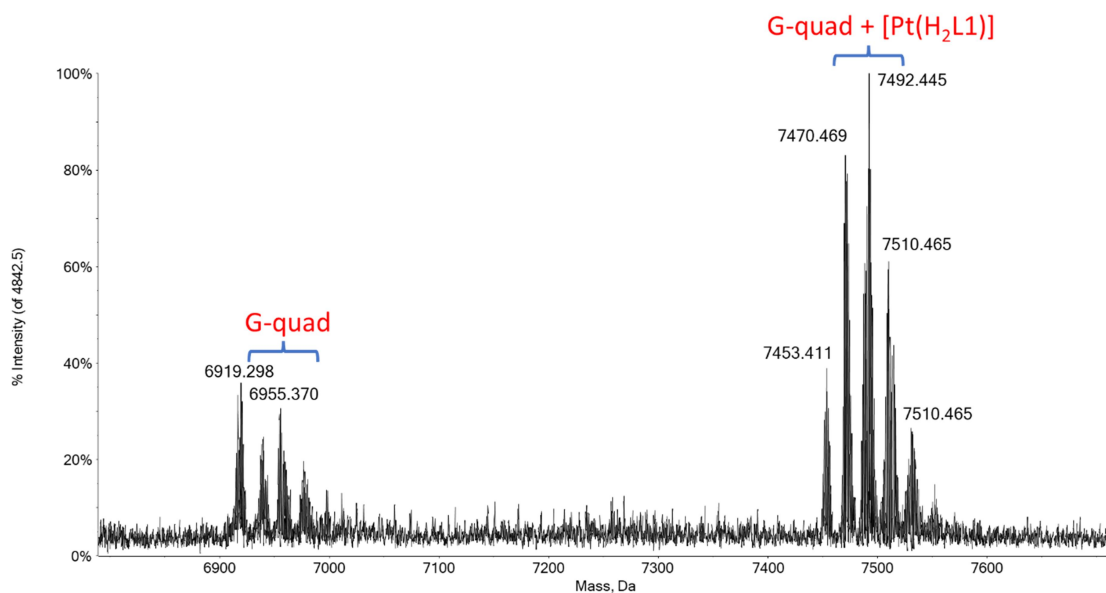

**Figure S16.** Deconvoluted ESI mass spectrum of  $10^{-6}$  M G-quadruplex incubated for 24 h with  $[\text{Pt}(\text{H}_2\text{L1})]\text{Cl}_2$  in 100 mM ammonium acetate solution (pH 7.0) and in the presence of 60% EtOH. 3:1 metal complex/G-quad molar ratio.

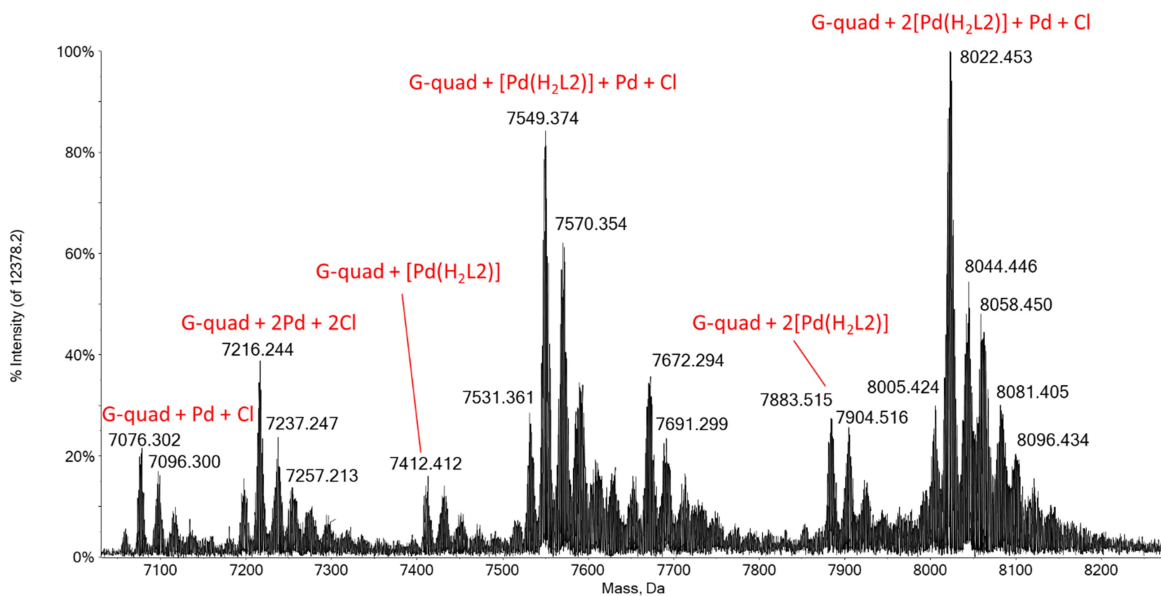

**Figure S17.** Deconvoluted ESI mass spectrum of  $10^{-6}$  M G-quadruplex incubated for 24 h with  $[\text{Pd}(\text{H}_2\text{L}_2)]\text{Cl}_2$  in 100 mM ammonium acetate solution (pH 7.0) and in the presence of 60% EtOH. 3:1 metal complex/G-quad molar ratio.



## RNA-4WJ absorbance titrations

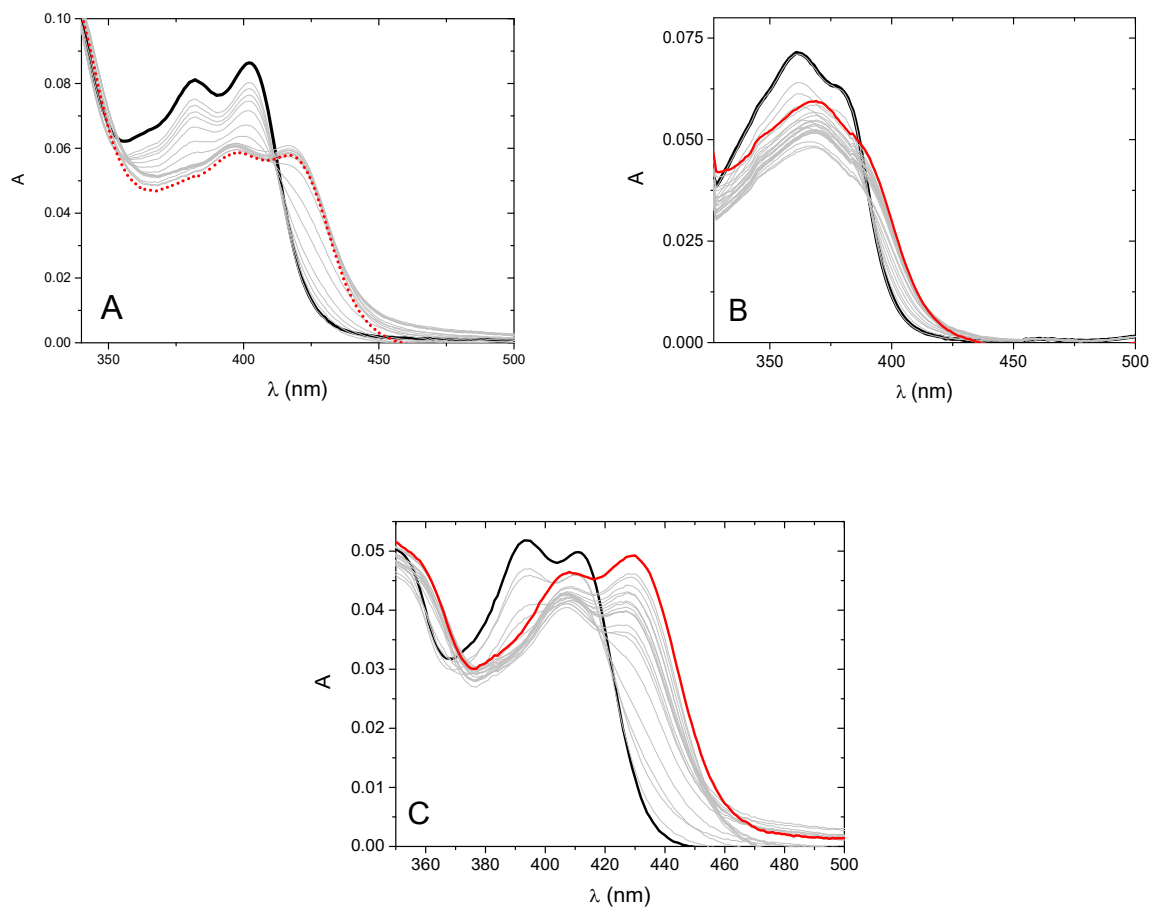

**Figure S18.** UV-vis titrations with RNA-4WJ,  $\text{CaCl}_2$  182  $\mu\text{M}$ , pH 7.0,  $T = 25.0$   $^\circ\text{C}$ . (A)  $[\text{Pd}(\text{H}_2\text{L1})]\text{Cl}_2/\text{RNA-4WJ}$  system,  $C_{\text{Pd}} = 8.76 \times 10^{-6}$  M,  $C_{\text{RNA4WJ}}$  from 0 M (—) to  $6.20 \times 10^{-6}$  M (.....); (B)  $[\text{Pd}(\text{L3})](\text{OAc})_2/\text{RNA-4WJ}$  system,  $C_{\text{Pd}} = 9.06 \times 10^{-6}$  M,  $C_{\text{RNA4WJ}}$  from 0 M (—) to  $7.58 \times 10^{-6}$  M (.....); (C)  $[\text{Pt}(\text{H}_2\text{L1})]\text{Cl}_2/\text{RNA-4WJ}$  system,  $C_{\text{Pt}} = 8.75 \times 10^{-6}$  M,  $C_{\text{RNA4WJ}}$  from 0 M (—) to  $6.16 \times 10^{-6}$  M (.....).

## RNA-4WJ melting tests

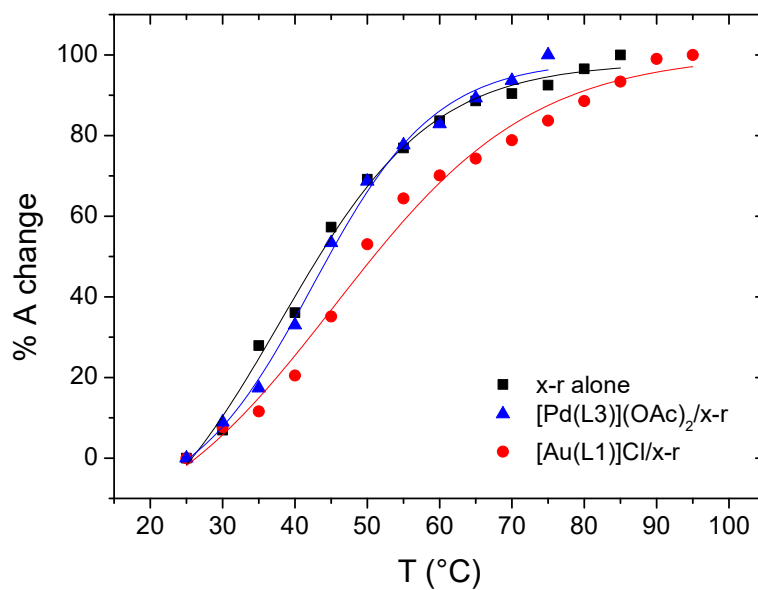

**Figure S19.** Melting profiles for the coupled x-r strands alone, for the [Pd(L3)](OAc)<sub>2</sub>/x-r strands system and for the [Au(L1)]Cl/x-r strands system;  $C_{x-r} = 1.03 \times 10^{-5}$  M,  $C_{Pd} = 1.86 \times 10^{-5}$  M,  $C_{Au} = 1.83 \times 10^{-5}$  M;  $C_{CaCl_2} = 182$   $\mu$ M, pH 7.0,  $\lambda = 260$  nm; % A change =  $100 \cdot (A - A^\circ) / (A^\infty - A^\circ)$  where  $A^\infty$  and  $A^\circ$  are the two absorbance values limiting the fitting sigmoid.
